# Supplementary material for: Transcriptome profiling of root microRNAs reveals novel insights into taproot thickening in radish (Raphanus sativus L.)
Source: PubMed Central journal article supplement (PMC4341240; doi:10.1186/s12870-015-0427-3), 2015-02-03
Supplement: 12870_2015_427_MOESM3_ESM.pdf [file 12870_2015_427_MOESM3_ESM.pdf]

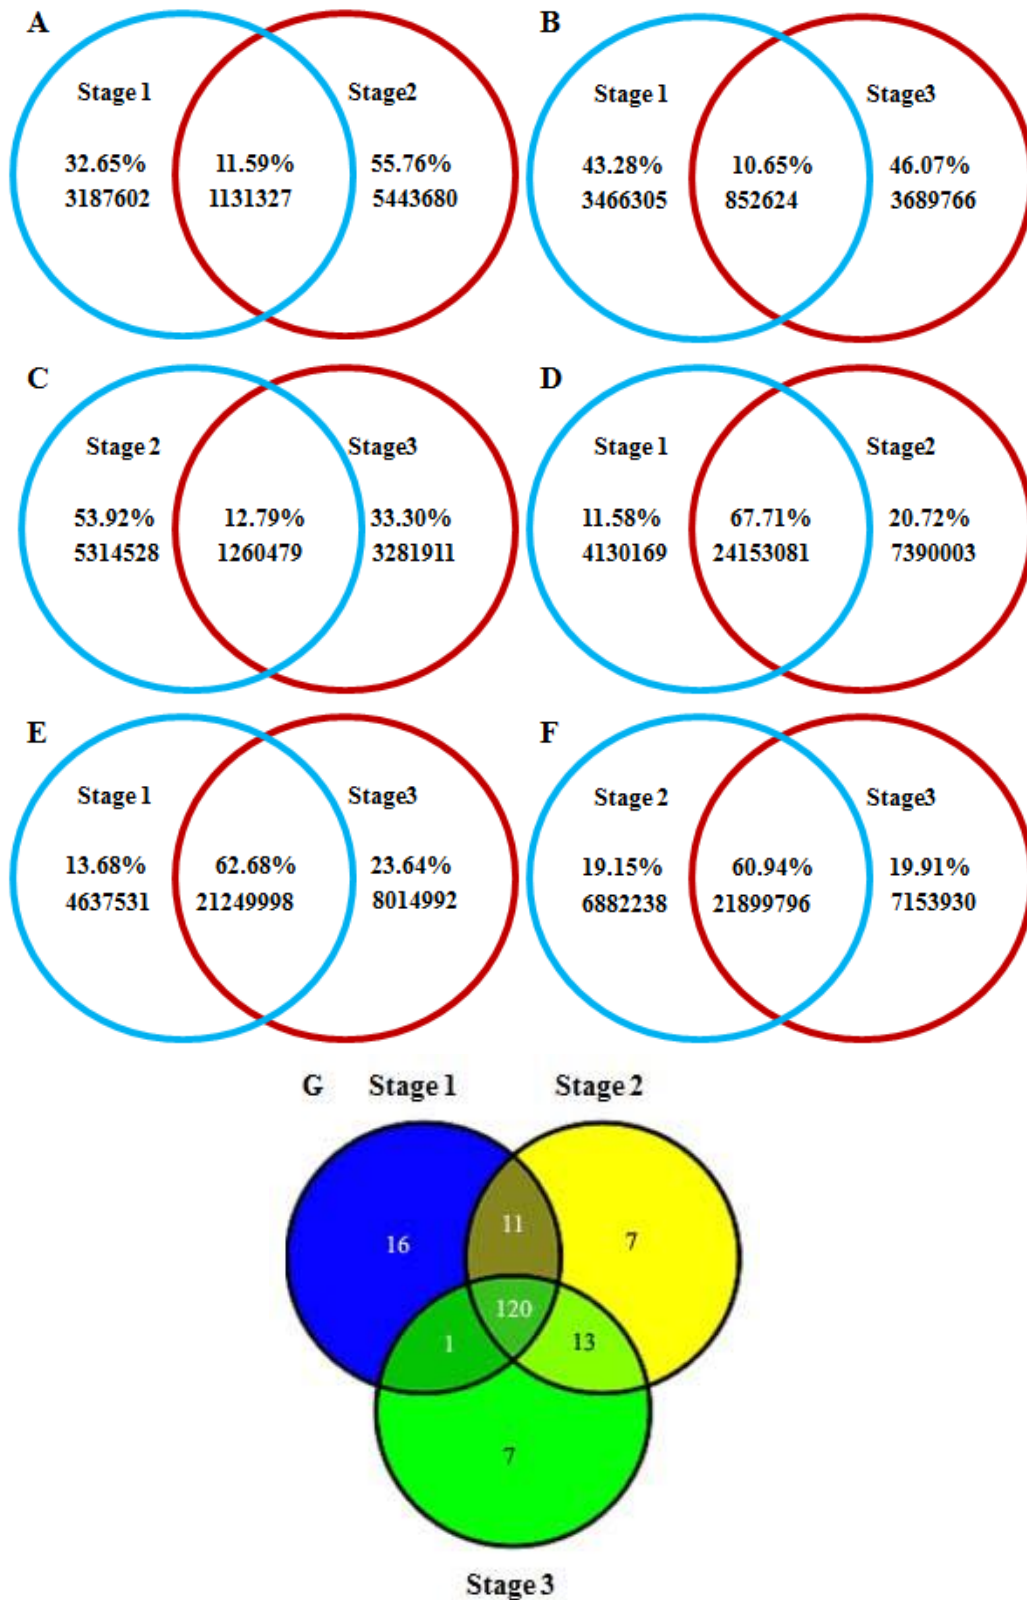

**Additional file 3. Venn diagrams for analysis of Small RNAs.** (A-F) Summary of common and specific unique (A, B and C) sRNAs and total ( D, E and F) sRNAs between different libraries. (G) Known miRNAs among different libraries.
